1

2

3

4 **Inhibitory neurosteroid reverses the dendritic spine disorder**

5 **caused by gain-of-function GABA<sub>A</sub>R epilepsy variants**

6

7

8 Saad Hannan\*, Kamei Au & Trevor G Smart\*

9

10 Department of Neuroscience, Physiology and Pharmacology, University College London,

11 WC1E 6BT, UK

12

13 \*correspondence to [s.hannan@ucl.ac.uk](mailto:s.hannan@ucl.ac.uk) and [t.smart@ucl.ac.uk](mailto:t.smart@ucl.ac.uk)

14

15 Keywords: Epilepsy, inhibition, GABA<sub>A</sub> receptor, dendritic spine, plasticity, neurosteroid,

16 pregnenolone sulphate, spontaneous activity

17 **Abstract**

18 GABA<sub>A</sub> receptors (GABA<sub>A</sub>Rs) are key orchestrators of neuronal activity and several GABA<sub>A</sub>R  
19 variants have been linked to genetic neurodevelopmental disorders (NDDs) and epilepsies.  
20 Here, we report two variants (Met263Lys, Leu267Ile) in the predominant GABA<sub>A</sub>R  $\alpha$ 1 subunit  
21 gene (*GABRA1*) that increase apparent receptor affinity for GABA and confer spontaneous  
22 receptor activity. These gain-of-function features are unusual because GABA<sub>A</sub>R variants are  
23 traditionally thought to cause seizures by reducing inhibitory neurotransmission. Both  
24 Met263Lys and Leu267Ile increased tonic and spontaneous GABAergic conductances in  
25 neurons revealed by competitive inhibition and channel block of GABA<sub>A</sub>Rs. Significantly,  $\alpha$ 1-  
26 subunit variant expression in hippocampal neurons also reduced dendritic spine density. Our  
27 results indicate that elevated GABAergic signalling can precipitate genetic epilepsies and  
28 NDDs. Furthermore, the mechanistic basis may involve the de-compartmentalisation of  
29 excitatory inputs due to the removal of dendritic spines. This aberrant structural plasticity can  
30 be reversed by the naturally-occurring, therapeutically-tractable, inhibitory neurosteroid,  
31 pregnenolone sulphate.

32

## 33 Introduction

34  $\gamma$ -aminobutyric acid type-A receptors (GABA<sub>A</sub>Rs) mediate inhibitory signalling in the brain.  
35 Upon their activation by the brain's most abundant inhibitory neurotransmitter, GABA, these  
36 receptors increase the membrane conductance to Cl<sup>-</sup> and HCO<sub>3</sub><sup>-</sup> that collectively causes  
37 membrane hyperpolarisation and/or shunting of excitatory synaptic potentials<sup>1,2</sup>. These  
38 receptors are known to be vital for controlling neuronal excitability and it is therefore  
39 unsurprising that genetic variants of GABA<sub>A</sub>Rs feature prominently in a wide variety of  
40 neurological and neuropsychiatric disorders<sup>3,4</sup>. GABA<sub>A</sub>Rs are hetero-pentameric ligand-gated  
41 ion channels composed from nineteen subunits ( $\alpha$ 1-6,  $\beta$ 1-3,  $\gamma$ 1-3,  $\rho$ 1-3,  $\delta$ ,  $\theta$ ,  $\epsilon$ ,  $\pi$ ) with  
42 prototypical receptors comprised of 2 $\alpha$ , 2 $\beta$ , and  $\gamma$  or  $\delta$  subunits<sup>1,5</sup>.

43 Genetic epilepsies manifest as sudden uncontrolled bursts of electrical activity in the brain  
44 resulting in seizures<sup>6,7</sup>. Subunit variants of nearly all the major isoforms of GABA<sub>A</sub>Rs have  
45 been implicated in causing genetic epilepsies that are often co-morbid with  
46 neurodevelopmental disorders (NDDs). The mechanisms by which GABA<sub>A</sub>R variants can  
47 cause epilepsy ultimately results in dysfunctional inhibition variously achieved by altering:  
48 receptor sensitivity to GABA or other ligands<sup>8</sup>; GABA<sub>A</sub>R activation and deactivation kinetics<sup>8-</sup>  
49 <sup>10</sup>; assembly<sup>11,12</sup>; trafficking and cell surface expression<sup>10,13-15</sup>; and degradation<sup>16,17</sup>.

50 Dysfunctionally low levels of brain neurosteroids are also associated with epilepsy (eg,  
51 gender-specific catamenial epilepsy)<sup>18</sup>. This is significant since neurosteroids are potent  
52 endogenous modulators of GABA<sub>A</sub>Rs and are tractable compounds for treating GABAergic  
53 disorders, including epilepsy<sup>18,19</sup>. Brain neurosteroids can be functionally categorised into two  
54 main groups – those that exert positive allosteric and direct activation effects at GABA<sub>A</sub>Rs,  
55 such as allopregnanolone, and those that act as negative allosteric modulators, inhibiting  
56 GABA<sub>A</sub>R function, such as pregnenolone sulphate (PS).

57 Although reduced GABAergic signalling is intuitively presumed to initiate seizures and NDDs,  
58 it is notable that pathogenic GABA<sub>A</sub>R variants exhibiting increased activity do exist in non-

59 neuronal tissues<sup>20,21</sup> and are likely to do so in the brain. However, the mechanisms by which  
60 increased GABAergic signalling initiates pathogenesis is unknown, and furthermore, there are  
61 no therapeutic options for targeting such hyperactive GABA<sub>A</sub>R variants.

62 The  $\alpha$ 1-GABA<sub>A</sub>R is the major isoform in the brain accounting for ~35% of GABA<sub>A</sub>Rs<sup>22</sup>. Two  
63 human  $\alpha$ 1-subunit epilepsy and NDD variants (accession - VCV000280804.2, c.788T>A,  
64 p.Met263Lys, Met236Lys; accession - VCV000205521.3, c.799C>A, p.Leu267Ile, Leu240Ile,  
65 numbers refer to the mature protein) were selected from the ClinVar database based on their  
66 proximity to the positive allosteric neurosteroid binding site located at the receptor's  $\beta$ - $\alpha$   
67 subunit interface, within the transmembrane domain straddling  $\beta$ M3- $\alpha$ M1 (Fig. 1a-c)<sup>23</sup>.

68 Here, we report that these variants unexpectedly confer gain-of-function properties on the  
69 receptors with consequences for the structural dendritic plasticity of principle neurons. By  
70 examining the profiles of GABA<sub>A</sub>R  $\alpha$ 1 subunit-containing ( $\alpha$ 1-GABA<sub>A</sub>R) variants causing  
71 epileptic and NDD phenotypes, we probe how a native neurosteroid may be useful in reversing  
72 these key detrimental effects.

73

74

75

76

77

78

79

80

81

## 82 Results

### 83 Spontaneously active GABA<sub>A</sub>R epilepsy variants

84 To explore the biophysical properties of  $\alpha 1$  subunits incorporating M236K and L240I, we  
85 created recombinant mutant  $\alpha 1$  subunits (M235K and L239I) and expressed them in HEK-293  
86 cells as  $\alpha 1\beta 2\gamma 2L$  assemblies. Generating GABA concentration response curves revealed that  
87 the receptors carrying M235K or L239I possessed increased sensitivity to GABA (lower  $EC_{50S}$ )  
88 compared to wild-type counterpart receptors (Fig. 2a-c,  $P < 0.001$ , One-way ANOVA) with lower  
89 maximal currents at saturating GABA concentrations (Fig. 2d;  $P < 0.01$ /  $P < 0.001$ , One-way  
90 ANOVA). Another notable feature was the lower Hill slope for M235K. Studying the  
91 macroscopic properties of maximal GABA currents for the  $\alpha 1$ -variants revealed a slower  
92 deactivation rate (Fig. 2d;  $P < 0.001$ , One-way ANOVA) and reduced desensitisation ( $P < 0.01$ /  
93  $P < 0.001$ , One-way ANOVA) without changing receptor activation kinetics ( $p = 0.3063$ ).

94 The lower maximum currents for M235K and L239I could reflect reduced cell surface  
95 expression. However, using antibody labelling in HEK-293 cells, no change was observed for  
96 L239I ( $P > 0.05$ ), although cell surface expression of M235K was reduced (Supplementary Fig.  
97 1;  $P < 0.001$ , One-way ANOVA). The reduced maximum currents and increased potency were  
98 not a consequence of aberrant assembly with receptors lacking  $\gamma 2$  subunits<sup>24</sup>, since the  
99 expressed  $\alpha 1$ -variant receptors, and wild-type counterpart, were insensitive to  $Zn^{2+}$ , which is  
100 a 'fingerprint' for  $\alpha 1\beta 2\gamma 2$  receptors ( $P > 0.05$ ) contrasting with  $\alpha 1\beta 2$  receptor currents which are  
101 highly-sensitive to  $Zn^{2+}$  inhibition (Supplementary Fig. 2;  $P < 0.001$ , One-way ANOVA)

102 Under basal GABA-free conditions, cells expressing  $\alpha 1$ -variants exhibited unusually high leak  
103 currents that were reduced by the GABA<sub>A</sub>R channel blocker picrotoxin, in a concentration-  
104 dependent manner (Fig. 2e-g). This is indicative of spontaneous activity and was confirmed  
105 by current-voltage (I-V) relationships with picrotoxin revealing a basal current at all voltages  
106 in the absence of GABA, which remained minimal for wild-type receptors (Fig. 2g). These  
107 results indicate that  $\alpha 1^{M235K}$  and  $\alpha 1^{L239I}$ -GABA<sub>A</sub>Rs are spontaneously-active, more sensitive to

108 GABA, with some limited cell surface expression, and aberrant gating kinetics. Many of these  
109 changes are indicative of a gain-of-function profile - this is unusual even counter-intuitive for  
110 GABA<sub>A</sub>R epilepsy-inducing variants, which are normally associated with compromised  
111 inhibitory signalling.

112

### 113 **Increased tonic currents and spontaneous activity of GABA<sub>A</sub>R epilepsy variants in** 114 **neurons**

115 To probe the functional consequences of spontaneously-active  $\alpha 1$ -variants in a native  
116 environment, we transfected hippocampal neurons for electrophysiological analysis.  
117 Expression of just wild-type  $\alpha 1$  subunits did not affect whole-cell muscimol (100  $\mu$ M) current  
118 density ( $p = 0.2446$ , selected as a specific GABA<sub>A</sub>R agonist), or the amplitude ( $p = 0.1519$ )  
119 and frequency ( $p = 0.3693$ ) of GABA-mediated spontaneous inhibitory postsynaptic currents  
120 (sIPSCs), compared to eGFP-expressing or untransfected neurons (Fig. 3a-d; One-way  
121 ANOVA). We presume that transfecting the  $\alpha 1$  construct did not cause receptor  
122 overexpression because the endogenous supply of  $\beta$  and  $\gamma$  subunits is rate limiting. However,  
123 sIPSC kinetics in wild-type  $\alpha 1$  expressing neurons reduced their decay time ( $p = 0.0232$ ,  $p =$   
124  $0.0007$ ) without changing rise-time ( $p = 0.131$ ) or charge transfer ( $p = 0.291$ ) (Fig. 3e; One-  
125 way ANOVA) probably because increasing the number of  $\alpha 1$  subunits simply substituted for  
126 other  $\alpha$ -subunit synaptic GABA<sub>A</sub>Rs with slower kinetics. Given that M235K and L239I are  
127 spontaneously active, in a native neuronal environment context, these variants should  
128 increase the basal inhibitory tone at both synaptic and extrasynaptic locations.

129 Expressing M235K and L239I significantly increased tonic GABA currents by up to ~10-fold  
130 revealed by the GABA<sub>A</sub>R antagonist bicuculline<sup>5</sup> (Fig. 4a,b;  $P < 0.001$ , One-way ANOVA), and  
131 by co-applying picrotoxin, which resolved an additional tonic component due to the  
132 spontaneous activity of M235K ( $P < 0.001$ ) and L239I ( $P < 0.05$ ). This feature was absent  
133 ( $P > 0.05$ ; One-way ANOVA) in wild-type  $\alpha 1$ -subunit expressing neurons. Membrane current

134 variance (noise) for  $\alpha 1^{M235K}$  and  $\alpha 1^{L239I}$ -expressing neurons was also increased compared to  
135 wild-type ( $P < 0.001$ , One-way ANOVA; [Fig. 4c,d](#)), and provided another indicator of increased  
136 spontaneous activity. Bicuculline partly reduced the increased variance, which was only  
137 normalised to control wild-type levels ( $p = 0.44$ , One-way ANOVA) when picrotoxin was  
138 subsequently co-applied with bicuculline.

139 To ascertain the cell surface expression levels for the  $\alpha 1$ -variants in hippocampal neurons, N-  
140 terminal myc-tagged subunits were used in conjunction with immunocytochemistry. Both  $\alpha 1$ -  
141 variants showed reduced cell surface expression compared to their wild-type equivalents  
142 ([Supplementary Fig. 3](#);  $P < 0.01$ ,  $P < 0.001$ , One-way ANOVA).

143 Overall, these results suggest that the spontaneously-active  $\alpha 1$ -GABA<sub>A</sub>R variants are  
144 expressed on neuronal surface membranes, albeit at a reduced level, resulting in increased  
145 GABA-mediated tonic current, and notably, a spontaneous GABA<sub>A</sub>R-mediated membrane  
146 conductance.

147

#### 148 **Reduced spine density due to GABA<sub>A</sub>R epilepsy variants**

149 To assess the impact of elevated GABA-dependent and -independent tonic membrane  
150 conductances on excitatory synaptic inputs, we measured miniature excitatory postsynaptic  
151 currents (mEPSCs) in hippocampal neurons treated with tetrodotoxin. Applying bicuculline  
152 and picrotoxin revealed no change to mEPSC frequency ( $p = 0.94$ ) or amplitude ( $p = 0.3446$ )  
153 ([Fig. 5a,b](#); One-way ANOVA) implying that, functionally, postsynaptic inputs were apparently  
154 unperturbed by either  $\alpha 1^{M235K}$  or  $\alpha 1^{L239I}$ . However, quite unexpectedly, the structural plasticity  
155 of dendritic spines was affected, potentially underlying seizure activity<sup>25</sup>, with spine density  
156 reduced ( $p = 0.0206$ ) without changing the mean spine head diameter ( $p = 0.6217$ ) for M235K  
157 and L239I compared to wild-type GABA<sub>A</sub>Rs ([Supplementary Fig. 4d](#), [Fig. 5c,d](#); One-way  
158 ANOVA). Categorising the dendritic spines revealed reduced numbers of mushroom spines  
159 ( $p = 0.0263$ ) and increased thin spines ( $p = 0.0237$ ), with stubby spines remaining unchanged

160 ( $p = 0.9816$ ), for neurons expressing the  $\alpha 1$ -variants (One-way ANOVA; [Supplementary Fig](#)  
161 [4e, Fig. 5d](#)). These changes to spine density, spine type and size were not apparent on  
162 expressing wild-type  $\alpha 1$  subunits or eGFP alone, indicating  $\alpha$  subunit expression *per se*, and  
163 /or subunit-switching artefacts, do not account for the results with the  $\alpha 1$ -variants  
164 ([Supplementary Data Fig. 4a-c](#);  $P > 0.05$ , two-tailed unpaired t-test).

165

### 166 **Inhibitory neurosteroids reverse dendritic spine defects due to GABA<sub>A</sub>R epilepsy** 167 **variants**

168 To attempt to correct the deficits in spine density, we presumed that controlling the increased  
169 activity of the  $\alpha 1$ -variants would be critical. To achieve this, we selected a naturally-occurring  
170 inhibitory neurosteroid in the brain, PS, to act as a negative allosteric modulator<sup>26</sup>. Applying 5  
171  $\mu\text{M}$  PS for 48 hr to neuronal cultures expressing  $\alpha 1^{\text{L239I}}$  reversed the deficits in spine density,  
172 contrasting with the lack of effect of PS on dendritic spines of neurons expressing just eGFP  
173 or wild-type  $\alpha 1$  subunits ([Fig. 6a-c](#);  $p = 0.0136$ ,  $p = 0.7372$ , two-tailed unpaired t-test;  
174 [Supplementary Fig. 4f](#)). For M235K, spine density showed a tendency to increase in PS ( $p =$   
175  $0.09$ ) compared to untreated M235K-expressing cells ([Fig. 6b](#)). Furthermore, the differences  
176 in mushroom, stubby and thin spines between  $\alpha 1$ -variants and  $\alpha 1$  wild-type expressing  
177 neurons were absent in the presence of PS suggesting that the neurosteroid affected spine  
178 maturation for spontaneously-active GABA<sub>A</sub>R variant-expressing neurons ([Supplementary](#)  
179 [Fig. 5a](#),  $P > 0.05$ , One-way ANOVA). Application of PS did not change the frequency or  
180 amplitudes of mEPSCs for  $\alpha 1$ -variant and wild-type  $\alpha 1$ -subunit expressing neurons ([Fig. 6d-f](#),  
181  $P > 0.05$ , two-tailed unpaired t-test).

182 The significance of reducing spontaneous GABA<sub>A</sub>R activation for correcting spine deficits was  
183 evident with the more potent GABA antagonist, picrotoxin (50  $\mu\text{M}$ ). When applied for the same  
184 duration as PS, picrotoxin increased spine density for  $\alpha 1^{\text{M235K}}$  ( $p = 0.014$ ) and  $\alpha 1^{\text{L239I}}$  ( $p =$   
185  $0.0007$ ), as well as for eGFP only ( $p = 0.0082$ ) expressing neurons ([Fig 7a,c,d](#); two-tailed



186 unpaired t-test). There was also a trend for spine density of wild-type  $\alpha$ 1-expressing neurons  
187 to increase in picrotoxin (Fig. 7b) and a similar normalisation of mushroom and thin spines in  
188 picrotoxin was evident (Supplementary Fig. 5b;  $P > 0.05$ , One-way ANOVA) highlighting a  
189 common thread of reduced inhibition favouring spine development and/or maintenance. Spine  
190 deficits and their reversal by picrotoxin has also been reported with a trafficking defective  $\beta$ 3-  
191 GABA<sub>A</sub>R subunit<sup>27</sup>.

192

### 193 **An M1 hotspot for spontaneous active epilepsy-inducing GABA<sub>A</sub>R variants**

194 Finally, we studied two additional variants at the M1 TMD M235 site that are linked to West  
195 syndrome severe epilepsy and intellectual disability (ID)<sup>28,29</sup>. These variants (human M263I  
196 (accession - VCV000402327.1) and M263T, numbered by including the signal sequence and  
197 equivalent to mouse M235I and M235T in the mature protein) also showed gain-of-function  
198 properties increasing GABA potency when expressed as  $\alpha$ 1 $\beta$ 2 $\gamma$ 2L receptors, by ~4 to 14-fold  
199 compared to wild-type (Fig 8a-c). In addition, these receptors exhibited reduced maximal  
200 GABA currents, and spontaneity, revealed by picrotoxin, suggesting that the TMD methionine  
201 residue is crucial for GABA<sub>A</sub>R function (Fig. 8d-e;  $P < 0.001$ , One-way ANOVA). This region of  
202 M1 could therefore represent a critical region (hotspot) for disease-relevant spontaneously-  
203 active GABA<sub>A</sub>Rs.

204

205

## 206 Discussion

207 Here, we identify the first  $\alpha 1$ -GABA<sub>A</sub>R variants to exhibit spontaneous receptor activity that  
208 are linked to severe neurological consequences. These spontaneously-active GABA<sub>A</sub>R  
209 epilepsy variants are expressed on neuronal plasma membranes and increase GABA-  
210 mediated tonic and spontaneous membrane Cl<sup>-</sup> conductances. The increased tonic GABA  
211 current mediated by the  $\alpha 1$ -variants is likely to reflect the higher apparent affinity these  
212 receptors have for GABA, thus increasing their activation compared to wild-type receptors, at  
213 ambient extrasynaptic GABA concentrations.

214 Our results tentatively identify a variant hotspot at the base of  $\alpha 1$ -GABA<sub>A</sub>R in M1 that  
215 generates spontaneously active GABA<sub>A</sub>Rs. The presence of individuals with epilepsy due to  
216 substitution of M235 (M235I, M235T and M25K) and neighbouring L239 close to the positive  
217 allosteric neurosteroid binding site makes this previously well-characterised area<sup>23,30</sup> a focus  
218 of pathological interest. Notably, equivalent variants located on human GABA<sub>A</sub>R  $\alpha 2$   
219 (accession–VCV000689389.2, M263T) and  $\beta 3$  subunits (accession - VCV000975911.1;  
220 L256Q) are also linked to severe epilepsy with ID<sup>31,32</sup>. The M1 domains of  $\alpha 1$ ,  $\alpha 2$  and  $\beta 3$   
221 subunits are highly conserved (Fig 1a) and  $\alpha 2$ - and  $\beta 3$ -GABA<sub>A</sub>Rs are also major GABA<sub>A</sub>R  
222 isoforms in the cortex<sup>22</sup>. Although the functional properties of  $\beta 3$ <sup>L256Q</sup> are unknown,  $\alpha 2$ <sup>M263T</sup>  
223 increases GABA potency, copying the profile of the  $\alpha 1$ -variants studied here, suggesting that  
224 these  $\alpha 2$ -receptors may well also increase tonic inhibition. Therefore, the base of the  $\alpha$ -helical  
225 M1 could represent a critical receptor sub-domain for pathogenic variants initiating  
226 neurodevelopmental disorder via spontaneously-active gain-of-function GABA<sub>A</sub>Rs.  
227 Potentiating neurosteroids are known to bind to this area<sup>23,30</sup> and allosterically modulate  
228 GABA<sub>A</sub>Rs by increasing GABA potency and facilitating receptor gating<sup>33,34</sup>. Substitution of the  
229 identified methionine or leucine residues in this area could alter the packing of the  
230 transmembrane domain to enable spontaneous GABA-independent gating. It is also likely that  
231 other disparate transmembrane domain variants of GABA<sub>A</sub>R subunits could also achieve  
232 similar results by destabilising the ion channel activation and desensitisation gates.

233 Whereas reduced GABAergic signalling features prominently in the causation of epilepsy and  
234 NDD, counterintuitively, our results show that increased apparent affinity and spontaneous  
235 activity of GABA<sub>A</sub>Rs can be pro-convulsive therefore sub-classifying this type of hyperactive-  
236 GABAergic-dependent epilepsy. The mechanism(s) by which spontaneous activity causes  
237 convulsions could involve several possibilities: increased spontaneity could raise intracellular  
238 Cl<sup>-</sup> shifting the equilibrium potential for GABA to depolarising levels or increased membrane  
239 shunting of interneurons could reduce GABA release to dampen the inhibition of excitatory  
240 networks. Whilst these remain as possibilities, a loss of dendritic spines due to spontaneous  
241 GABA<sub>A</sub>R activity as observed in our study, altering neural connectivity to favour excitation over  
242 inhibition was not expected. The removal of dendritic spines may result in an inability of  
243 neurons to compartmentalise their excitatory inputs. Losing dendritic spines, but without  
244 changing mEPSC frequency, suggests that overall neural connectivity remains intact.  
245 However, a higher proportion of inputs to  $\alpha 1$ -variant expressing neurons will likely be made to  
246 regions of dendrites that now lack physical compartmentalisation normally afforded by mature  
247 dendritic spine structure<sup>35</sup>. Although the precise mechanism remains unknown, a reduced  
248 electrical compartmentalisation exacerbated by GABA<sub>A</sub>R activity, could increase electrotonic  
249 communication amongst juxtaposed excitatory synapses perhaps leading to the generation of  
250 backpropagating action potentials and increased excitability.

251 Dendritic spines receive the bulk of excitatory inputs and structural plasticity of spines has  
252 been studied in detail<sup>36</sup>. For instance, stabilisation of spines has been described to be  
253 important in memory and learning<sup>37</sup>. Consistent with this, long-term neural plasticity changes  
254 have been reported with picrotoxin treatment in a Down syndrome mouse model of cognitive  
255 disability. Picrotoxin was applied to combat excessive GABAergic inhibition in this model<sup>38</sup> and  
256 was accompanied by a reduced dendritic spine density<sup>39,40</sup>.

257 Interestingly, elevation of tonic GABA-mediated inhibition plays an important role in setting the  
258 window for critical period plasticity<sup>41</sup> and brain circuit development, and here too, dendritic  
259 spines undergo dramatic structural changes during critical phases<sup>42,43</sup> coinciding with the time-

260 point for the maturation of parvalbumin interneurons<sup>44,45</sup>. Furthermore, activation of GABA<sub>A</sub>Rs  
261 with agonists such as muscimol, or uncaging of GABA to brain slices, also reduces dendritic  
262 spine motility<sup>46</sup>.

263 The present study has interesting parallels with multiple previous studies that have noted  
264 dendritic spine density changes evident in epileptic brain tissue specimens from human and  
265 animal models<sup>25,47,48</sup>. In patients with temporal lobe epilepsy, a reduction of dendritic spine  
266 density of hippocampal principal neurons has been widely reported. In addition, animal models  
267 of chronic and acute seizures also show similar reductions of dendritic spines often followed  
268 by formation of varicose swellings<sup>25</sup>. Increasing intracellular Cl<sup>-</sup> levels have been held  
269 responsible for the formation of varicose bodies during excitotoxic insults<sup>49,50</sup>. The intriguing  
270 question is what is the role of the spines and why is their removal precipitating epilepsy? By  
271 virtue of their high spine neck resistance and low capacitance<sup>51</sup>, spines are considered to  
272 normalise the variability of excitatory transmission providing consistency to EPSPs including  
273 spike initiation in the dendrite arbour<sup>52</sup>. On this basis, we would expect EPSPs emanating from  
274 spine synapses to be faster and of shorter duration compared to dendritic shaft synapses  
275 where broader EPSPs would be expected with potential ramifications for integrating excitatory  
276 transmission over the dendritic arbour. Our results suggest the loss of spines will exacerbate  
277 this difference in excitatory transmission and may underlie the impact that elevated GABAergic  
278 signalling has on initiating seizures.

279 Our results also provide proof-of-concept for using inhibitory neurosteroids to reverse the  
280 structural dendritic deficits caused by the mechanistically “atypical” hyperactive GABAergic-  
281 dependent epilepsy. Application of a more potent antagonist, picrotoxin, also reversed the  
282 spine deficits confirming the role of  $\alpha 1$ -variant gain-of-function receptors in this form of  
283 epilepsy. Interestingly, picrotoxin increased spine density of eGFP-only expressing neurons,  
284 as well as for the  $\alpha 1$ -variants, whereas PS selectively restored dendritic spine levels just for  
285 the  $\alpha 1$ -variant expressing neurons. The spine density increase was greater for picrotoxin  
286 compared to PS possibly reflecting the differential potencies for inhibiting GABA<sub>A</sub>Rs. Overall,

287 PS, or alternative inhibitory neurosteroid derivatives, may offer a highly attractive  
288 therapeutically-tractable drug alternative for treating such gain-of-function GABA<sub>A</sub>Rs that are  
289 associated with epilepsy and NDD.

290

291 **Figure Legends**

292 **Figure 1 Location of GABA<sub>A</sub>R variants**

293 **a** Primary amino acid sequence alignment of transmembrane domain 1 (M1; residues in blue)  
294 for human  $\alpha 1$ ,  $\alpha 2$  and  $\beta 3$  subunits. The numbering includes respective signal sequences. The  
295 red boxes show two residues: M263 of  $\alpha 1$  and  $\alpha 2$  (also the equivalent L256 of  $\beta 3$ ); and L267  
296 of  $\alpha 1$ . **b, c** 3D structure of an  $\alpha 1\beta 3\gamma 2L$  GABA<sub>A</sub>R showing the TMD location of  $\alpha 1$ -M263 and  
297  $\alpha 1$ -L267 in M1 in side- (**b**) and top-down (**c**) views. The structure was based on PDB 6I53<sup>53</sup>.

298

299

300 **Figure 2 – Spontaneous activity of GABA<sub>A</sub>R variants**

301 GABA-activated currents (**a**), GABA concentration response relationships (**b**), and mean  
302 GABA EC<sub>50</sub>s (**c**). **d** Macroscopic kinetic properties of GABA currents, left to right panels are:  
303 averaged peak-scaled GABA-activated current waveforms evoked by saturating 1 mM GABA,  
304 mean 10 – 90 % GABA current activation time, % desensitisation during GABA application  
305 and deactivation time constant after GABA washout. **e** Outward currents following  
306 concentration-dependent block by picrotoxin of the spontaneous current. **f** picrotoxin inhibition  
307 curves for the spontaneous current. **g** Current-voltage (I-V) relationships for picrotoxin-  
308 sensitive currents. Data accrued from HEK-293 cells expressing either  $\alpha 1$  wild-type or variant  
309  $\alpha 1^{M235K}$  or  $\alpha 1^{L239I}$  with  $\beta 2$  and  $\gamma 2L$  subunits. In **g**, I-V data represent current subtractions of I-V  
310 relationships in the presence and absence of picrotoxin. GABA EC<sub>50</sub>s are:  $\alpha 1^{WT}\beta 2\gamma 2L = 6.97$   
311  $\pm 0.61 \mu M$  (n = 17),  $\alpha 1^{M235K}\beta 2\gamma 2L = 3.38 \pm 0.68 \mu M$  (n = 11),  $\alpha 1^{L239I}\beta 2\gamma 2L = 1.73 \pm 0.28 \mu M$  (n  
312 = 11). Picrotoxin IC<sub>50</sub>s are:  $\alpha 1^{M235K}\beta 2\gamma 2L = 1.74 \pm 0.37 \mu M$  (n = 5),  $\alpha 1^{L239I}\beta 2\gamma 2L = 1.67 \pm 0.79$   
313  $\mu M$  (n = 5). Bar graphs in this and succeeding figures represent means  $\pm$  S.E.M. of individual  
314 data points (symbols); \*\*P<0.01, \*\*\*P<0.001; One-way ANOVA post-hoc Tukey test.  $F_{(2, 36)} =$   
315 22.3, p<0.0001 (**c**);  $F_{(2, 36)} = 44.3$ , p<0.0001 (**d**, mean current);  $F_{(2, 36)} = 1.22$ , p=0.3063 (**d**, 10  
316 – 90 % current activation time);  $F_{(2, 35)} = 14.6$ , p<0.0001 (**d**, % desensitisation of peak current);  
317  $F_{(2, 35)} = 23$ , p<0.0001 (**d**, deactivation tau for GABA currents); n = 5 - 17 cells.

318

319 **Figure 3 - Electrophysiology of  $\alpha 1$ -GABA<sub>A</sub>Rs expressed in hippocampal neurons**

320 **a** Whole-cell 100  $\mu$ M muscimol-activated currents recorded at -20 mV from untransfected  
321 (UTF), eGFP-expressing neurons, and neurons expressing wild-type  $\alpha 1$  and eGFP at 12-14  
322 DIV. **b** Mean muscimol current densities of neurons.  $n = 12 - 21$  neurons.  $F_{(2, 47)} = 1.45$ ,  $p =$   
323  $0.2446$ . **c** Spontaneous IPSCs recorded from untransfected (UTF) dissociated hippocampal  
324 neurons, and from neurons expressing just eGFP (GFP) or with wild-type  $\alpha 1$  ( $\alpha 1^{WT}$ ) GABA<sub>A</sub>Rs.  
325 Higher time resolution records for selected periods (red boxes) are shown on the right. **d** Mean  
326 frequency (Freq., upper panel) and amplitude (Amp., lower panel) for sIPSCs.  $n = 12 - 17$   
327 neurons.  $F_{(2, 42)} = 1.02$ ,  $p = 0.3693$  for freq,  $F_{(2, 42)} = 1.97$ ,  $p = 0.1519$  for Amp. **e** From left to  
328 right panels: averaged peak-scaled sIPSC waveforms; sIPSC rise-times ( $F_{(2, 42)} = 2.1$ ,  $p =$   
329  $0.131$ ); half-decay times ( $T_{50}$ ;  $F_{(2, 42)} = 8.6$ ,  $p = 0.0007$ ); exponential decay times ( $F_{(2, 39)} = 4.15$ ,  
330  $p = 0.0232$ ); and sIPSC areas (charge transfer;  $F_{(2, 39)} = 1.3$ ,  $p = 0.291$ ) of hippocampal neurons  
331 expressing eGFP with or without wild-type  $\alpha 1$  ( $\alpha 1^{WT}$ ) GABA<sub>A</sub>Rs or untransfected neurons.  $n =$   
332  $11 - 17$  neurons. \* $P < 0.05$ , \*\*\* $P < 0.001$ , one-way ANOVA.

333

334



335 **Figure 4 - Increased tonic currents and spontaneous activity of GABA<sub>A</sub>R epilepsy**  
336 **variants in neurons**

337 **a** Blockade of tonic and spontaneous GABA-mediated membrane current. Inset (red box)  
338 shows the switch between bicuculline (Bic) and Bic + picrotoxin (PTX) at increased resolution.  
339 **b** Tonic currents in Bic and in Bic + PTX. **c** Epochs (30 s) of root mean square (RMS)  
340 membrane current noise. **d** Comparison of RMS noise for hippocampal neurons expressing  
341 wild-type or variant  $\alpha 1$  subunits in control or in 25  $\mu$ M Bic with or without and 100  $\mu$ M PTX.  $F_{(2, 37)} = 19.6$ ,  $p < 0.0001$  (**b**, Bic);  $F_{(2, 36)} = 14.4$ ,  $p < 0.0001$  (**b**, Bic + PTX);  $F_{(2, 36)} = 36.5$ ,  $p < 0.0001$  (**d**,  
342 control);  $F_{(2, 36)} = 10.5$ ,  $p = 0.0002$  (**d**, Bic);  $F_{(2, 36)} = 0.84$ ,  $p = 0.44$  (**d**, Bic + PTX).  $n = 11 - 17$   
343 neurons. \* $P < 0.05$ , \*\*\* $P < 0.001$ , one-way ANOVA.  
344

345

346

347 **Figure 5 – GABA<sub>A</sub>R epilepsy variants reduce spine density without affecting mEPSCs**

348 **a** Miniature EPSCs recorded from dissociated hippocampal neurons expressing wild-type or  
349  $\alpha$ 1-variant GABA<sub>A</sub>Rs and eGFP at 12-16 *DIV*. mEPSCs were recorded at -70 mV in the  
350 presence of 0.5  $\mu$ M tetrodotoxin, 25  $\mu$ M Bic and 50  $\mu$ M PTX. **(b)**, Mean frequency (Freq.) and  
351 amplitude of mEPSCs expressing wild-type or  $\alpha$ 1-variant GABA<sub>A</sub>Rs. ( $F_{(2, 32)} = 0.06$ ,  $p=0.94$ )  
352 for frequency and ( $F_{(2, 34)} = 1.1$ ,  $p = 0.3446$ ) for amplitude. **c** Images of dendrites from neurons  
353 expressing wild-type or variant  $\alpha$ 1-GABA<sub>A</sub>Rs with eGFP. **d** Mean spine density and relative  
354 proportions (%) of mushroom-shaped and thin spines for neurons expressing wild-type or  
355 variant  $\alpha$ 1-GABA<sub>A</sub>Rs.  $n = 16 - 36$  neurons. \* $P < 0.05$ , One-way ANOVA. Calibration bars = 5  
356  $\mu$ m.  $p = 0.0206$  (density);  $p = 0.0263$  (% mushroom);  $p = 0.0237$  (% thin).

357

358

359 **Figure 6 – Pregnenolone sulphate reverses spine density defects**

360 **a** Dendritic images and spine density for neurons expressing wild-type  $\alpha 1$ -GABA<sub>A</sub>Rs and  
361 eGFP in control or after 48 hr at 37°C of 5  $\mu$ M pregnenolone sulphate (PS). **b** Dendritic images  
362 and spine density of neurons expressing  $\alpha 1^{M235K}$ -GABA<sub>A</sub>Rs and eGFP in control or after PS  
363 treatment as in **a**. **c** Dendritic images and spine density of neurons expressing  $\alpha 1^{L239I}$ -  
364 GABA<sub>A</sub>Rs and eGFP in control or after 48 hr in PS. n = 16 - 36 neurons. NS – not significant,  
365 \*P<0.05, two-tailed unpaired t test, Mann-Whitney test, Calibration bars = 5  $\mu$ m. **d** Mean  
366 mEPSC frequency (p = 0.4025) and amplitude (p = 0.9355) for wild-type  $\alpha 1$ -expressing  
367 neurons in control and after PS. Neurons were treated with 5  $\mu$ M PS for 48 hr at 37°C prior to  
368 imaging. **e** Mean mEPSC frequency (p = 0.421) and amplitude (p = 0.0538) for  $\alpha 1^{M235K}$ -  
369 expressing neurons in control and in PS. **f** Mean mEPSC frequency (p = 0.9362) and  
370 amplitude (p = 0.5033) for  $\alpha 1^{L239I}$ -expressing neurons in control and in PS. n = 12 - 13  
371 neurons. NS – not significant; two-tailed unpaired t-test.

372

373

374 **Figure 7 - Picrotoxin increases spine density in hippocampal neurons**

375 **a** Confocal images of dendrites from hippocampal neurons expressing just eGFP in control  
376 (con) and after 50  $\mu$ M picrotoxin (PTX) for 48 hr at 37°C. Bargraph shows mean spine density  
377 in control and in PTX ( $p = 0.0082$ ). **b** Confocal images of dendrites from hippocampal neurons  
378 expressing  $\alpha 1$  wild-type and eGFP in control and in PTX. Bargraph presents mean spine  
379 densities (Con vs +PTX,  $p = 0.1461$ ). **c** Confocal images of dendrites from hippocampal  
380 neurons expressing  $\alpha 1^{M235K}$  and eGFP (Con and + PTX). Mean spine density is increased by  
381 PTX ( $p = 0.014$ ). **d** Images of hippocampal neuronal dendrites expressing  $\alpha 1^{L239I}$  and eGFP  
382 (con and + PTX). Mean spine density is increased by PTX ( $p = 0.0007$ ).  $n = 18 - 40$  neurons,  
383 NS – not significant, \* $P < 0.05$ , \*\* $P < 0.01$ , \*\*\* $P < 0.001$ , two-tailed unpaired t test. Calibration bars  
384 = 5  $\mu$ m.

385

386

387 **Figure 8 - Spontaneous activity of  $\alpha 1^{M235I}$  and  $\alpha 1^{M235T}$  variant GABA<sub>A</sub>Rs**

388 **a** GABA-activated currents recorded from HEK-293 cells expressing wild-type  $\alpha 1$ ,  $\alpha 1^{M235I}$  or  
389  $\alpha 1^{M235T}$  with  $\beta 2$  and  $\gamma 2L$ . **b** GABA concentration response relationships for  $\alpha 1\beta 2\gamma 2L$ ,  
390  $\alpha 1^{M235I}\beta 2\gamma 2L$  and  $\alpha 1^{M235T}\beta 2\gamma 2L$  receptors. **c** Mean GABA EC<sub>50</sub>s for  $\alpha 1\beta 2\gamma 2L$ ,  $\alpha 1^{M235I}\beta 2\gamma 2L$   
391 and  $\alpha 1^{M235T}\beta 2\gamma 2L$ . EC<sub>50</sub>s:  $\alpha 1^{WT}\beta 2\gamma 2L = 6.1 \pm 0.9 \mu M$  (n = 6),  $\alpha 1^{M235I}\beta 2\gamma 2L = 1.4 \pm 0.2 \mu M$  (n =  
392 7),  $\alpha 1^{M235T}\beta 2\gamma 2L = 0.45 \pm 0.06 \mu M$  (n = 9).  $F_{(2, 19)} = 40$ ,  $p < 0.0001$ . **d** Maximal GABA currents  
393 for  $\alpha 1\beta 2\gamma 2L$ ,  $\alpha 1^{M235I}\beta 2\gamma 2L$  and  $\alpha 1^{M235T}\beta 2\gamma 2L$ .  $F_{(2, 18)} = 23.8$ ,  $p < 0.0001$ . **e** Current-voltage (I-V)  
394 relationships for PTX-sensitive currents recorded from  $\alpha 1\beta 2\gamma 2L$ ,  $\alpha 1^{M235I}\beta 2\gamma 2L$  and  
395  $\alpha 1^{M235T}\beta 2\gamma 2L$ . I-V curves presented are subtractions of I-V relationships in the presence and  
396 absence of PTX. n = 6 - 9, \*\*\*P < 0.001, One-way ANOVA.

397

398

399

400 **Data Availability**

401 The data that are presented in this study are available from the corresponding author on  
402 reasonable request. A source data file containing raw data is also included and uploaded  
403 online. See further details in the Reporting Summary.

404

405 **Acknowledgements** This work was supported by the MRC and Wellcome Trust (TGS), and  
406 by an early career fellowship (SH) from the International Rett Syndrome Foundation.

407

408 **Contributions** – SH conceptualised, and SH and TGS designed and planned the study, SH  
409 and KA performed the data acquisition and analysis, TGS performed the receptor modelling,  
410 SH and TGS secured project funding. All the authors participated in the writing, reviewing and  
411 editing of the manuscript.

412

413 **Author Information**

414 **Affiliation**

415 Department of Neuroscience, Physiology and Pharmacology, University College London,  
416 WC1E 6BT, UK. Saad Hannan, Kamei Au & Trevor G Smart

417

418 **Corresponding authors**

419 Correspondence to Saad Hannan (s.hannan@ucl.ac.uk) and Trevor G Smart  
420 (t.smart@ucl.ac.uk)

421

422 **Ethics Declarations**

423 The authors declare no competing interests or conflicts of interest

424 **Online Methods**

425 **Hippocampal neurons and cell culture** – All animal-based studies were performed in  
426 accordance with the UK Animals (Scientific Procedures) Act 1986. Cell culture reagents are  
427 from ThermoFisher, unless stated otherwise. Embryonic day 18 (E18) Sprague-Dawley rat  
428 hippocampi of either sex were prepared and seeded onto 18-22 mm glass coverslips (VWR)  
429 coated with poly-D-lysine in minimum essential media with 5% v/v fetal calf serum (FCS), 5%  
430 v/v horse serum, 50 units/ 50 µg/ml penicillin-G/ streptomycin, 2 mM glutamine and 20 mM  
431 glucose. After 3 hr, the medium was replaced with Neurobasal-A supplemented with 1% v/v  
432 B-27, 25 units/ 25 µg/ml penicillin-G/streptomycin, 0.5% v/v Glutamax and 35 mM glucose.  
433 Neurons were transfected 6-7 days *in vitro* (DIV) using either a calcium phosphate<sup>54</sup> or  
434 Effectene-based (Qiagen) method.

435 HEK-293 cells were grown at 37°C in 95% air/5% CO<sub>2</sub> in Dulbecco's modified Eagle's medium  
436 supplemented with 10% v/v FCS, 50 units/ ml penicillin-G, 50 µg/ ml streptomycin and 2 mM  
437 glutamine. HEK-293 cells were plated onto 22 mm glass coverslips, coated with poly-L-lysine,  
438 and transfected 1-2 hr after plating using a calcium phosphate method<sup>55</sup> with equimolar ratios  
439 of cDNAs encoding GABA<sub>A</sub>R α1, β2, γ2L and eGFP subunits.

440

441 **cDNA and constructs** – cDNAs for wild-type mouse α1, β2, γ2L, α1<sup>myc</sup> and eGFP have been  
442 described previously<sup>11</sup>. Human M263K (with signal sequence) or M236K (mature protein) and  
443 murine M235K (equivalent without signal sequence) were created using a single inverse  
444 PCR<sup>56</sup> and ligation using AGACAGTTATTCTCTCCCAAGTCTCC (forward primer) and  
445 TTATGCACGGCAGATATGTTTGAATAAC (reverse primer). Human M263I (with signal  
446 sequence) or M236I (mature protein) and murine M235I (equivalent without signal sequence),  
447 and human M263T (with signal sequence), or M236T (mature protein, and murine M235T  
448 (equivalent without the signal sequence) were created with  
449 TCACAGTTATTCTCTCCCAAGTCTCCTC and CGACAGTTATTCTCTCCCAAGTCTCCT

450 as forward primers, respectively, using the same reverse primer as for M235K. For L267I,  
451 L240I and L239I, these were created using the same strategy with  
452 ATCTCCCAAGTCTCCTTCTGGCTCAACAG (forward primer) and  
453 AATAACTGTCATTATGCACGGCAG (reverse primer). The integrity of all cDNAs was  
454 confirmed by DNA sequencing.

455

456 **Immunolabeling and confocal microscopy** - Cells were washed in phosphate-buffered  
457 saline (PBS) before fixation in 4% paraformaldehyde for 10 min at room temperature. Myc-  
458 tagged  $\alpha 1$ -GABA<sub>A</sub>R were labelled with mouse anti-myc antibody (ab32; Abcam) followed by  
459 goat anti-mouse Alexa Fluor-555 (A28180; ThermoFisher). Cells were imaged at 8-bit  
460 immediately following immunolabeling using a Zeiss LSM 510 microscope with a x40 objective  
461 and a 488 nm laser for imaging eGFP and a 543 nm laser for imaging Alexa Fluor 555 at  
462 optimum z-stack thickness. Images were analysed using Image J (ver 1.52i) by measuring  
463 mean cell surface fluorescence levels of defined regions-of-interest drawn around the  
464 periphery of cells<sup>54</sup>.

465

466 **Electrophysiology** – Whole-cell electrophysiology was carried out using borosilicate thin-  
467 walled glass patch electrodes (resistances of 3 – 5 M $\Omega$ ) with optimised series resistance (R<sub>s</sub>,  
468 <10 M $\Omega$ ) and whole-cell membrane capacitance compensation. Membrane currents were  
469 filtered at 5 kHz (-3 dB, 6th pole Bessel, 36 dB per octave). Cells were superfused with a  
470 saline solution containing (in mM): 140 NaCl, 4.7 KCl, 1.2 MgCl<sub>2</sub>, 2.52 CaCl<sub>2</sub>, 11 Glucose, and  
471 5 HEPES; pH 7.4. HEK-293 cells were studied 48 hr after transfection by voltage clamping at  
472 -20 to -30 mV using an internal solution containing (mM): 120 CsCl, 1 MgCl<sub>2</sub>, 1 CaCl<sub>2</sub>, 11  
473 EGTA, 30 KOH, 10 HEPES, and 2 K<sub>2</sub>ATP; pH 7.2.



474 GABA concentration response relationships were constructed by measuring currents ( $I$ )  
475 elicited at each GABA concentration and normalising these currents to the maximal response  
476 ( $I_{max}$ ). The concentration response relationship was fitted with the Hill equation:

$$477 \quad I/I_{max} = (1 / (1 + (EC_{50}/[A])^n))$$

478 where A is GABA concentration,  $EC_{50}$  is half-maximal GABA concentration and n is the Hill  
479 slope. The macroscopic kinetics of GABA-activated currents were studied in HEK-293 cells  
480 by applying 1 mM GABA<sup>57</sup>. The activation rate was the time taken to ascend from 10 - 90% of  
481  $I_{max}$  and the deactivation rate was the weighted tau of exponential fits from the point of  
482 cessation of GABA application until the baseline was attained.

483 I-V relationships were constructed by stepping the holding potential from -80 to 80 mV in  
484 increments of 10 mV in control and in the presence of 1 mM picrotoxin. The waveform in the  
485 presence of picrotoxin was subtracted from the basal curve to give the I-V relationship of  
486 picrotoxin-sensitive currents.

487 Neurons transfected at 7 DIV were voltage clamped using the same CsCl internal at -60 mV  
488 for recording spontaneous inhibitory postsynaptic currents (sIPSCs) and tonic currents.  
489 Neurons were superfused with the same saline solution as HEK-293 cells but supplemented  
490 with 2 mM kynurenic acid to block excitatory neurotransmission, as necessary. Membrane  
491 capacitance was measured by applying brief -10 mV hyperpolarising pulses and calculating  
492 the area under the capacity current discharge curve. Current densities were measured by  
493 dividing maximal GABA currents by the determined cell membrane capacitance.

494 Miniature excitatory postsynaptic currents (mEPSCs) were recorded at -70 mV in the same  
495 saline solution as HEK-293 cells but supplemented with 0.5  $\mu$ M tetrodotoxin, 25  $\mu$ M bicuculline  
496 and 50  $\mu$ M picrotoxin using an internal solution containing (mM): 145 Cs methanesulfonate, 5  
497 MgATP, 10 BAPTA, 0.2 Na<sub>2</sub>GTP, 10 HEPES, 2 QX314 and pH - 7.2.

498 **Imaging of dendritic spines** – Dendritic spines images were collected from eGFP co-  
499 expressing live transfected neurons at 12-16 *DIV* in a saline solution containing (in mM): 140  
500 NaCl, 4.7 KCl, 1.2 MgCl<sub>2</sub>, 2.52 CaCl<sub>2</sub>, 11 Glucose, and 5 HEPES; pH 7.4. For neurons with  
501 stereotypical pyramidal morphology, the segment of the apical dendrite closest to the soma  
502 was chosen for imaging and for neurons with non-pyramidal morphology the thickest dendrite  
503 was selected. 3D stacks of eGFP-filled dendrites were imaged with optimal z-thickness in 8-  
504 bit using a Zeiss LSM 510 microscope and a x40 water objective with an optical zoom of x2  
505 and a 488 nm laser. Dendritic spines were analysed using Neuronstudio<sup>58</sup> (Ver 0.9.92).

506

507

508

509

## References

- 510 1. Sigel, E. & Steinmann, M. E. Structure, Function, and Modulation of GABA<sub>A</sub> Receptors.  
511 *J. Biol. Chem.* **287**, 40224–40231 (2012).
- 512 2. Farrant, M. & Nusser, Z. Variations on an inhibitory theme: phasic and tonic activation  
513 of GABA<sub>A</sub> receptors. *Nat. Rev. Neurosci.* **6**, 215–229 (2005).
- 514 3. Tang, X., Jaenisch, R. & Sur, M. The role of GABAergic signalling in  
515 neurodevelopmental disorders. *Nat. Rev. Neurosci.* **22**, 290–307 (2021).
- 516 4. Möhler, H. GABA<sub>A</sub> receptors in central nervous system disease: Anxiety, epilepsy, and  
517 insomnia. *J. Recept. Signal Transduct.* **26**, 731–740 (2006).
- 518 5. Smart, T. G. & Stephenson, F. A. A half century of  $\gamma$ -aminobutyric acid. *Brain Neurosci.*  
519 *Adv.* **3**, 239821281985824 (2019).
- 520 6. Scheffer, I. E. & Berkovic, S. F. The genetics of human epilepsy. *Trends Pharmacol. Sci.*  
521 **24**, 428–433 (2003).
- 522 7. Wang, J. *et al.* Epilepsy-associated genes. *Seizure* **44**, 11–20 (2017).
- 523 8. Audenaert, D. *et al.* A novel GABRG2 mutation associated with febrile seizures.  
524 *Neurology* **67**, 687–690 (2006).
- 525 9. Hernandez, C. C. *et al.* Deleterious rare variants reveal risk for loss of gabaa receptor  
526 function in patients with genetic epilepsy and in the general population. *PLoS One* **11**,  
527 e0162883 (2016).
- 528 10. Lachance-Touchette, P. *et al.* Novel  $\alpha 1$  and  $\gamma 2$  GABA<sub>A</sub> receptor subunit mutations in  
529 families with idiopathic generalized epilepsy. *Eur. J. Neurosci.* **34**, 237–49 (2011).
- 530 11. Hannan, S. *et al.* Differential coassembly of  $\alpha 1$ -GABA<sub>A</sub>Rs associated with epileptic  
531 encephalopathy. *J. Neurosci.* **40**, 5518–5530 (2020).
- 532 12. Hales, T. G. *et al.* The epilepsy mutation,  $\gamma 2$ (R43Q) disrupts a highly conserved inter-  
533 subunit contact site, perturbing the biogenesis of GABA<sub>A</sub> receptors. *Mol. Cell. Neurosci.*  
534 **29**, 120–7 (2005).
- 535 13. Tian, M. *et al.* Impaired surface  $\alpha\beta\gamma$  GABA<sub>A</sub> receptor expression in familial epilepsy due  
536 to a GABRG2 frameshift mutation. *Neurobiol. Dis.* **50**, 135–141 (2013).
- 537 14. Kang, J.-Q. J. & Macdonald, R. L. The GABA<sub>A</sub> receptor  $\gamma 2$  subunit R43Q mutation linked

- 538 to childhood absence epilepsy and febrile seizures causes retention of  $\alpha 1\beta 2\gamma 2S$   
539 receptors in the endoplasmic reticulum. *J. Neurosci.* **24**, 8672–7 (2004).
- 540 15. Sancar, F. & Czajkowski, C. A GABA<sub>A</sub> receptor mutation linked to human epilepsy  
541 ( $\gamma 2R43Q$ ) impairs cell surface expression of  $\alpha\beta\gamma$  receptors. *J. Biol. Chem.* **279**, 47034–  
542 47039 (2004).
- 543 16. Hernandez, C. C. & Macdonald, R. L. A Structural look at GABA<sub>A</sub> receptor mutations  
544 linked to epilepsy syndromes. *Brain Res.* **1714**, 234–247 (2019).
- 545 17. Maljevic, S. *et al.* Spectrum of GABA<sub>A</sub> receptor variants in epilepsy. *Curr. Opin. Neurol.*  
546 **32**, 183–190 (2019).
- 547 18. Reddy, D. S. & Rogawski, M. A. Neurosteroid replacement therapy for catamenial  
548 epilepsy. *Epilepsy Mech. Model. Transl. Perspect.* **6**, 501–513 (2010).
- 549 19. Nohria, V. & Giller, E. Ganaxolone. *Neurotherapeutics* **4**, 102–105 (2007).
- 550 20. Hernandez, C. C. *et al.* GABA<sub>A</sub> Receptor Coupling Junction and Pore *GABRB3*  
551 Mutations are Linked to Early-Onset Epileptic Encephalopathy. *Sci. Rep.* **7**, 1–18  
552 (2017).
- 553 21. Absalom, N. L. *et al.* Gain-of-function *GABRB3* variants identified in vigabatrin-  
554 hypersensitive epileptic encephalopathies. *Brain Commun.* **2**, 1–16 (2020).
- 555 22. Whiting, P. J., McKernan, R. M. & Wafford, K. A. Structure and pharmacology of  
556 vertebrate GABA<sub>A</sub> receptor subtypes. *Int. Rev. Neurobiol.* **38**, 95–138 (1995).
- 557 23. Hosie, A. M., Wilkins, M. E., da Silva, H. M. A. & Smart, T. G. Endogenous  
558 neurosteroids regulate GABA<sub>A</sub> receptors through two discrete transmembrane sites.  
559 *Nature* **444**, 486–489 (2006).
- 560 24. Hosie, A. M., Dunne, E. L., Harvey, R. J. & Smart, T. G. Zinc-mediated inhibition of  
561 GABA<sub>A</sub> receptors: discrete binding sites underlie subtype specificity. *Nat. Neurosci.* **6**,  
562 362–369 (2003).
- 563 25. Wong, M. & Guo, D. Dendritic spine pathology in epilepsy: Cause or consequence?  
564 *Neuroscience* **251**, 141–150 (2013).
- 565 26. Seljeset, S., Lavery, D. & Smart, T. G. Inhibitory neurosteroids and the GABA<sub>A</sub>  
566 receptor. *Adv. Pharmacol.* **72**, 165–187 (2015).
- 567 27. Jacob, T. C. *et al.* GABA<sub>A</sub> receptor membrane trafficking regulates spine maturity. *Proc.*

- 568 *Natl. Acad. Sci.* **106**, 12500–12505 (2009).
- 569 28. Farnaes, L. *et al.* Rapid whole-genome sequencing identifies a novel *GABRA1* variant  
570 associated with West syndrome. *Cold Spring Harb. Mol. case Stud.* **3**, 1–8 (2017).
- 571 29. Kadera, H. *et al.* De novo *GABRA1* mutations in Ohtahara and West syndromes.  
572 *Epilepsia* **57**, 566–573 (2016).
- 573 30. Hosie, A. M., Wilkins, M. E. & Smart, T. G. Neurosteroid binding sites on GABA<sub>A</sub>  
574 receptors. *Pharmacol. Ther.* **116**, 7–19 (2007).
- 575 31. Myers, C. T. *et al.* De Novo Mutations in *SLC1A2* and *CACNA1A* Are Important Causes  
576 of Epileptic Encephalopathies. *Am. J. Hum. Genet.* **99**, 287–298 (2016).
- 577 32. Maljevic, S. *et al.* Novel *GABRA2* variants in epileptic encephalopathy and intellectual  
578 disability with seizures. *Brain* **142**, 1–6 (2019).
- 579 33. Bianchi, M. T. & MacDonald, R. L. Neurosteroids shift partial agonist activation of  
580 GABA<sub>A</sub> receptor channels from low- to high-efficacy gating patterns. *J. Neurosci.* **23**,  
581 10934–10943 (2003).
- 582 34. MacKenzie, G. & Maguire, J. Neurosteroids and GABAergic signaling in health and  
583 disease. *Biomol. Concepts* **4**, 29–42 (2013).
- 584 35. Jaslove, S. W. The integrative properties of spiny distal dendrites. *Neuroscience* **47**,  
585 495–519 (1992).
- 586 36. Nimchinsky, E. A., Sabatini, B. L. & Svoboda, K. Structure and Function of Dendritic  
587 Spines. *Annu. Rev. Physiol.* **64**, 313–353 (2002).
- 588 37. Kasai, H., Fukuda, M., Watanabe, S., Hayashi-Takagi, A. & Noguchi, J. Structural  
589 dynamics of dendritic spines in memory and cognition. *Trends Neurosci.* **33**, 121–129  
590 (2010).
- 591 38. Fernandez, F. & Garner, C. C. Over-inhibition: a model for developmental intellectual  
592 disability. *Trends Neurosci.* **30**, 497–503 (2007).
- 593 39. Fernandez, F. *et al.* Pharmacotherapy for cognitive impairment in a mouse model of  
594 Down syndrome. *Nat Neurosci* **10**, 411–413 (2007).
- 595 40. Belichenko, P. V *et al.* Synaptic structural abnormalities in the Ts65Dn mouse model of  
596 Down Syndrome. *J. Comp Neurol.* **480**, 281–298 (2004).

- 597 41. Iwai, Y., Fagiolini, M., Obata, K. & Hensch, T. K. Rapid critical period induction by tonic  
598 inhibition in visual cortex. *J. Neurosci.* **23**, 6695–6702 (2003).
- 599 42. Majewska, A. & Sur, M. Motility of dendritic spines in visual cortex *in vivo*: Changes  
600 during the critical period and effects of visual deprivation. *Proc. Natl. Acad. Sci. U. S.*  
601 *A.* **100**, 16024–16029 (2003).
- 602 43. Mataga, N., Mizuguchi, Y. & Hensch, T. K. Experience-dependent pruning of dendritic  
603 spines in visual cortex by tissue plasminogen activator. *Neuron* **44**, 1031–1041 (2004).
- 604 44. Hensch, T. K. Critical period plasticity in local cortical circuits. *Nat. Rev. Neurosci.* **6**,  
605 877–888 (2005).
- 606 45. Hensch, T. K. & Fagiolini, M. Excitatory-inhibitory balance and critical period plasticity  
607 in developing visual cortex. *Prog. Brain Res.* **147**, 115–124 (2005).
- 608 46. Hayama, T. *et al.* GABA promotes the competitive selection of dendritic spines by  
609 controlling local Ca<sup>2+</sup> signaling. *Nat Neurosci* **16**, 1409–1416 (2013).
- 610 47. Wong, M. Modulation of dendritic spines in epilepsy: Cellular mechanisms and  
611 functional implications. *Epilepsy Behav.* **7**, 569–577 (2005).
- 612 48. Swann, J. W., Al-Noori, S., Jiang, M. & Lee, C. L. Spine loss and other dendritic  
613 abnormalities in epilepsy. *Hippocampus* **10**, 617–625 (2000).
- 614 49. Hasbani, M. J., Hyrc, K. L., Faddis, B. T., Romano, C. & Goldberg, M. P. Distinct roles  
615 for sodium, chloride, and calcium in excitotoxic dendritic injury and recovery. *Exp.*  
616 *Neurol.* **154**, 241–258 (1998).
- 617 50. Al-Noori, S. & Swann, J. W. A role for sodium and chloride in kainic acid-induced  
618 beading of inhibitory interneuron dendrites. *Neuroscience* **101**, 337–348 (2000).
- 619 51. Adrian, M. *et al.* Barriers in the brain: Resolving dendritic spine morphology and  
620 compartmentalization. *Front. Neuroanat.* **8**, 1–12 (2014).
- 621 52. Gullledge, A. T., Carnevale, N. T. & Stuart, G. J. Electrical advantages of dendritic  
622 spines. *PLoS One* **7**, e36007 (2012).
- 623 53. Lavery, D. *et al.* Cryo-EM structure of the human  $\alpha 1\beta 3\gamma 2$  GABA<sub>A</sub> receptor in a lipid  
624 bilayer. *Nature* **565**, 516–520 (2019).
- 625 54. Hannan, S., Wilkins, M. E., Thomas, P. & Smart, T. G. Tracking cell surface mobility of  
626 GPCRs using alpha-bungarotoxin-linked fluorophores. *Methods Enzym.* **521**, 109–129

- 627 (2013).
- 628 55. Hannan, S. *et al.* GABA<sub>A</sub>R isoform and subunit structural motifs determine synaptic and  
629 extrasynaptic receptor localisation. *Neuropharmacology* **169**, 107540 (2019).
- 630 56. Hannan, S., Wilkins, M. E. & Smart, T. G. Sushi domains confer distinct trafficking  
631 profiles on GABA<sub>B</sub> receptors. *Proc.Natl.Acad.Sci.U.S.A* **109**, 12171–12176 (2012).
- 632 57. Thomas, P. & Smart, T. G. Use of electrophysiological methods in the study of  
633 recombinant and native neuronal ligand-gated ion channels. *Curr. Protoc. Pharmacol.*  
634 (2012) doi:10.1002/0471141755.ph1104s59.
- 635 58. Rodriguez, A., Ehlenberger, D. B., Dickstein, D. L., Hof, P. R. & Wearne, S. L.  
636 Automated three-dimensional detection and shape classification of dendritic spines  
637 from fluorescence microscopy images. *PLoS One* **3**, e(1997) (2008).
- 638
- 639
- 640
- 641



a

|            |     |                                    |     |
|------------|-----|------------------------------------|-----|
|            |     | <u>M1</u>                          |     |
| $\alpha 1$ | 247 | KRKIGYFVIQTYLPCIMTVILSQVSFWLNRES   | 278 |
| $\alpha 2$ | 247 | KRKIGYFVIQTYLPCIMTVILSQVSFWLNRES   | 278 |
| $\beta 3$  | 240 | KRNIGYFILQTYMPSILITILSWVSFWINYDA   | 272 |
|            |     | **:*:*:*:*:*:*:*:*:*:*:*:*:*:*:*:* |     |

b

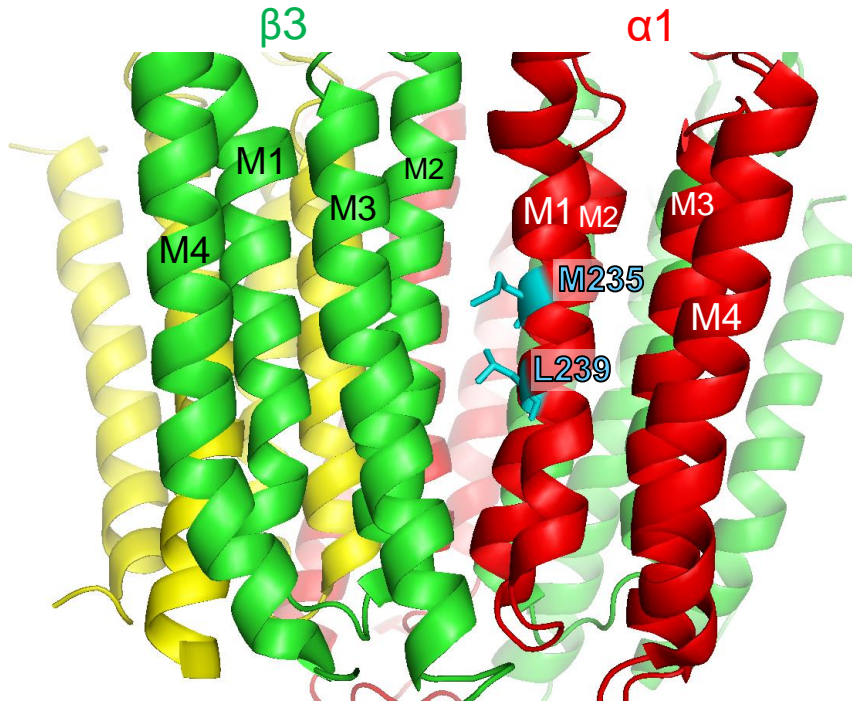

c

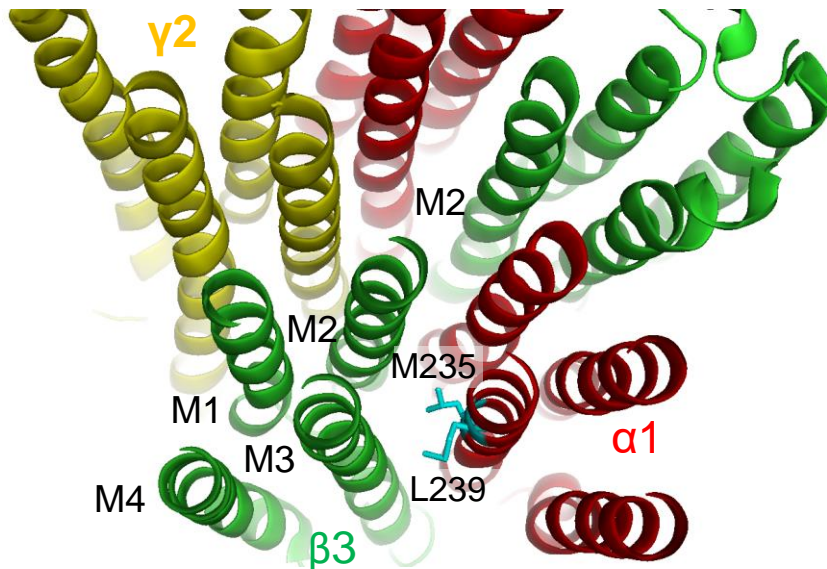

Figure 1



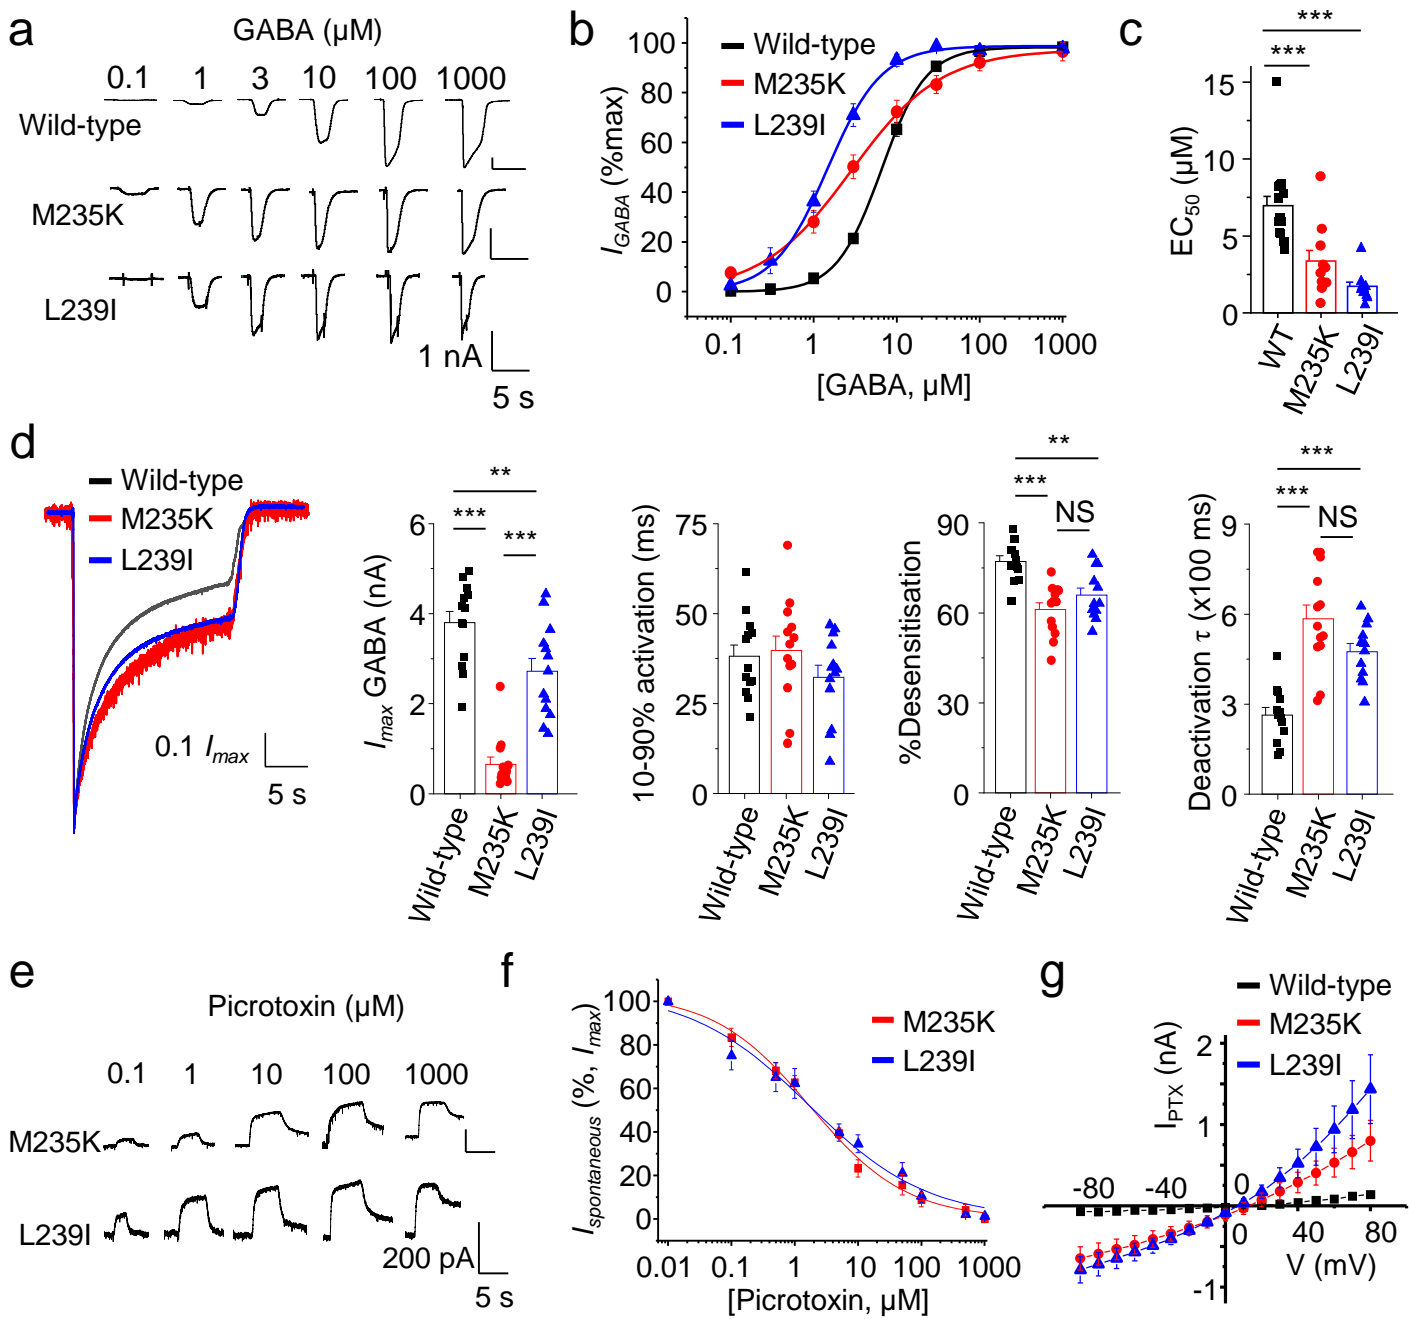

Figure 2

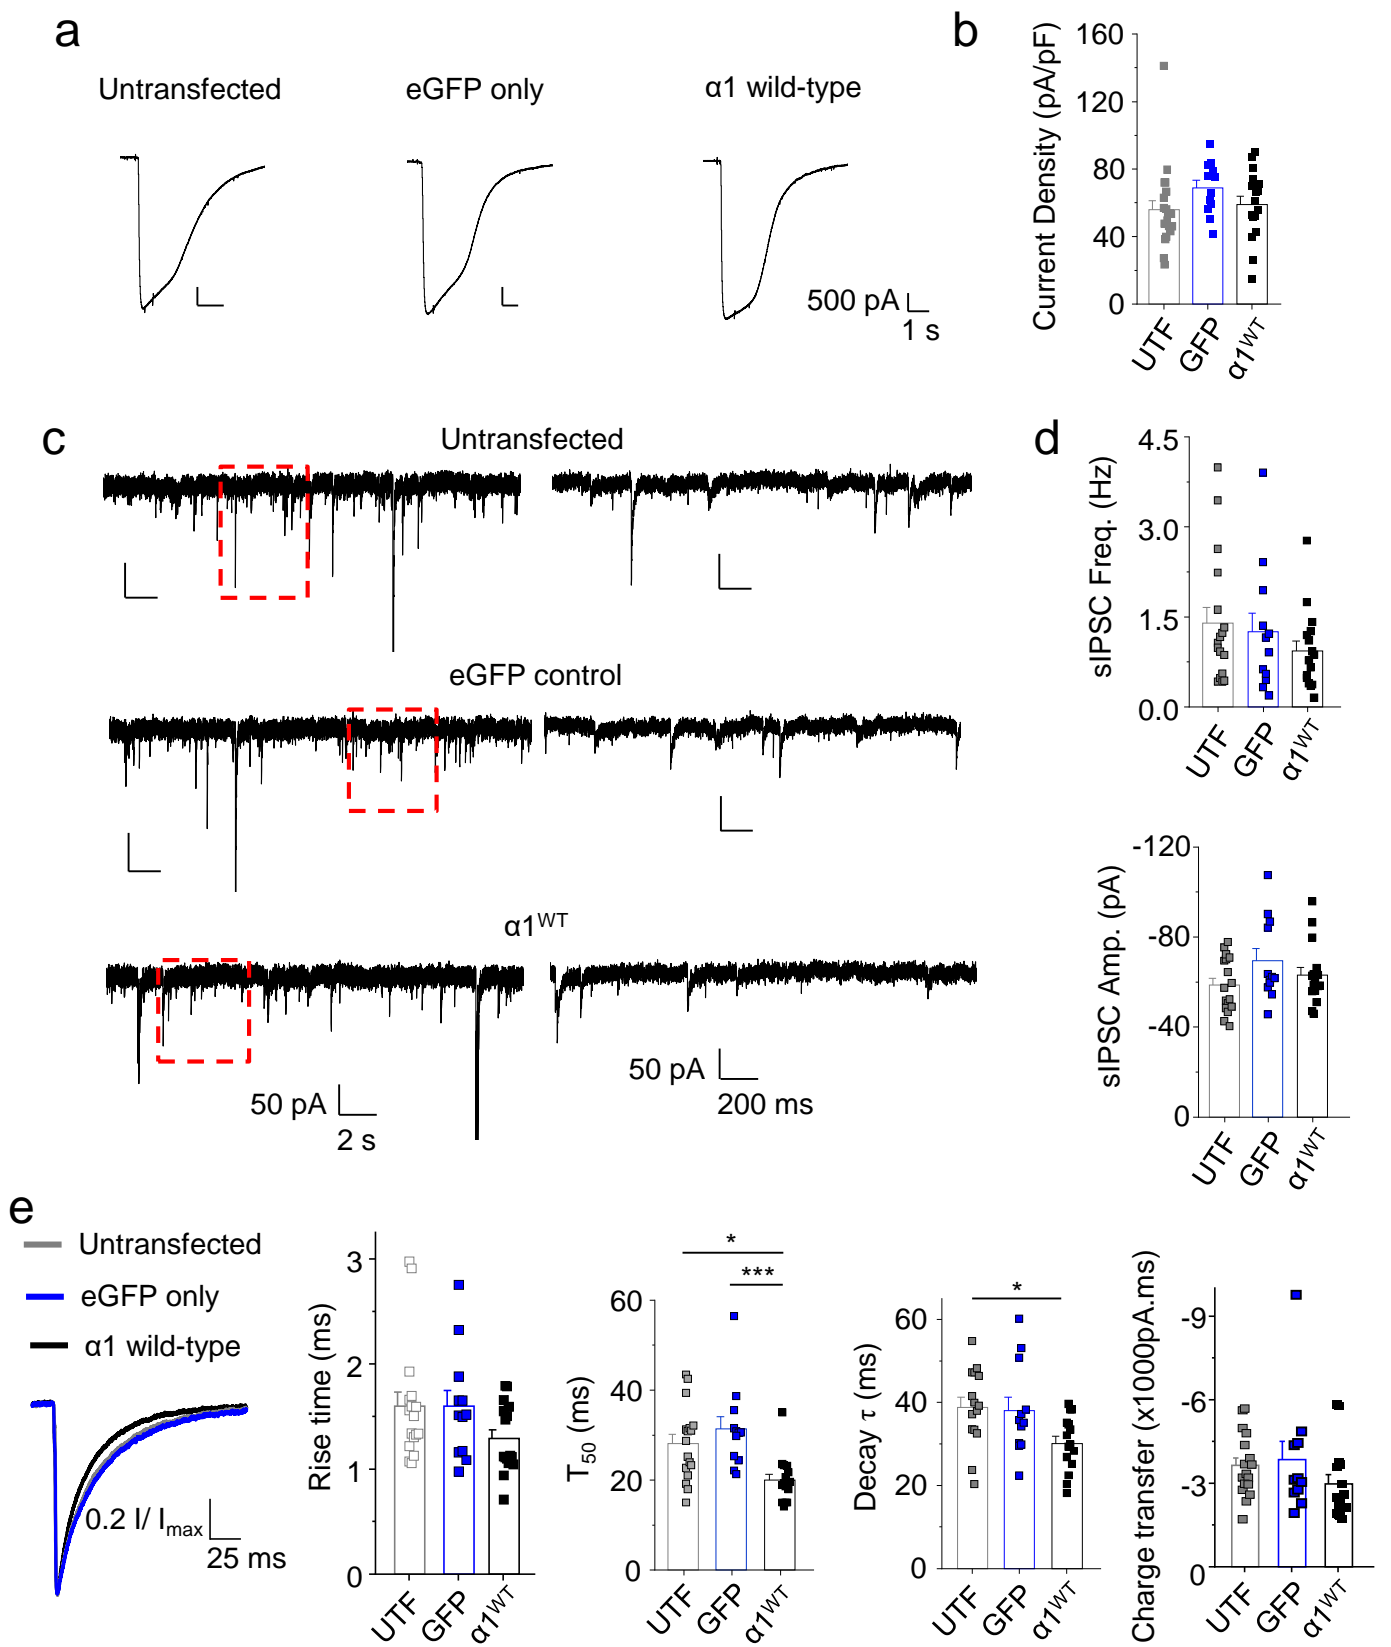

Figure 3

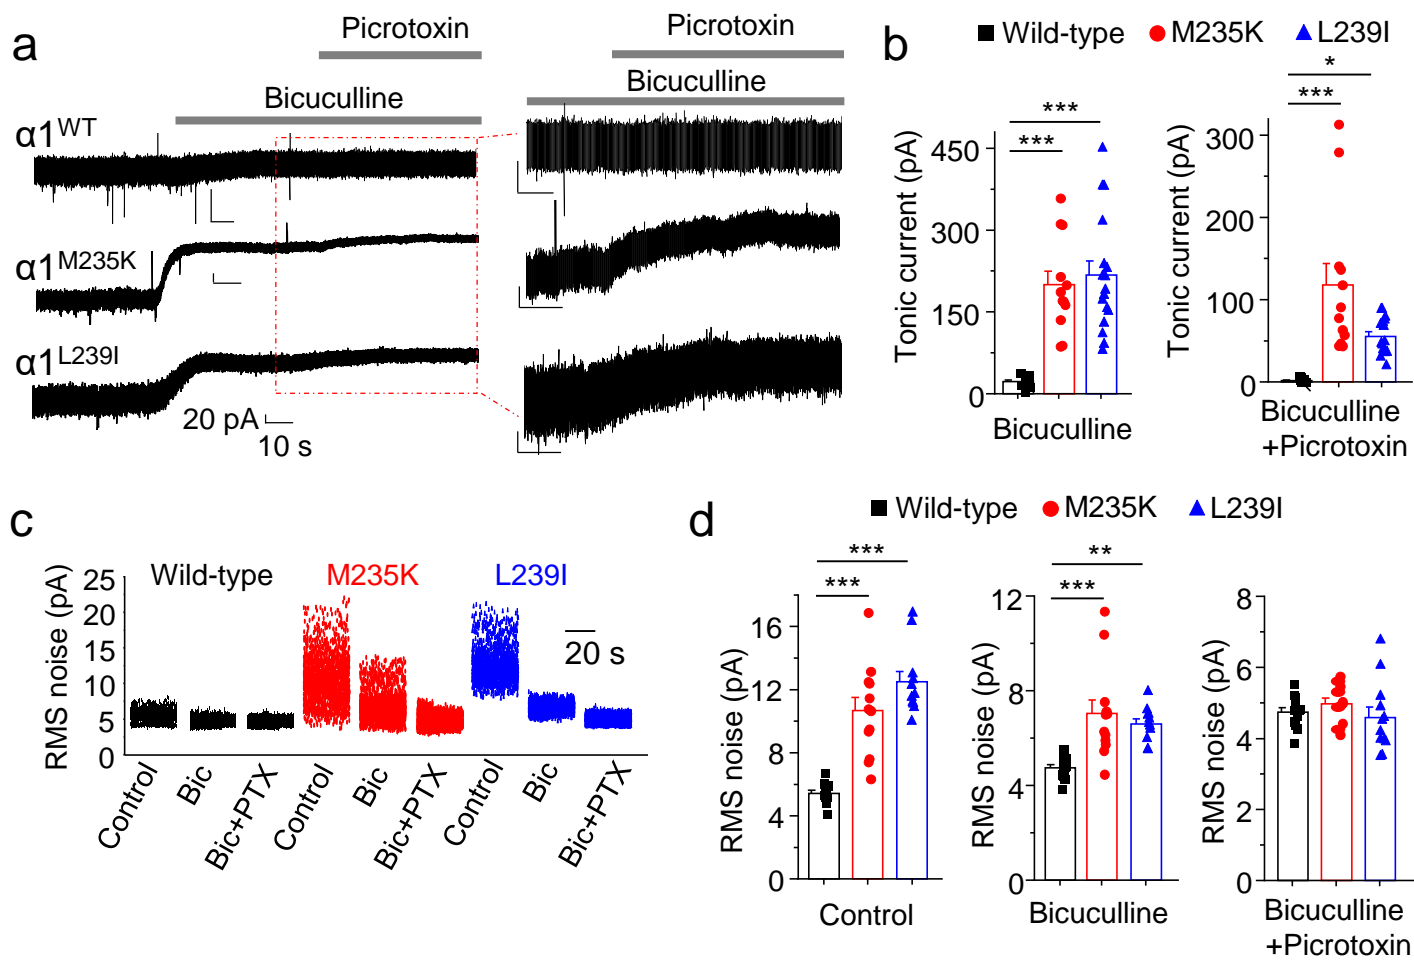

Figure 4

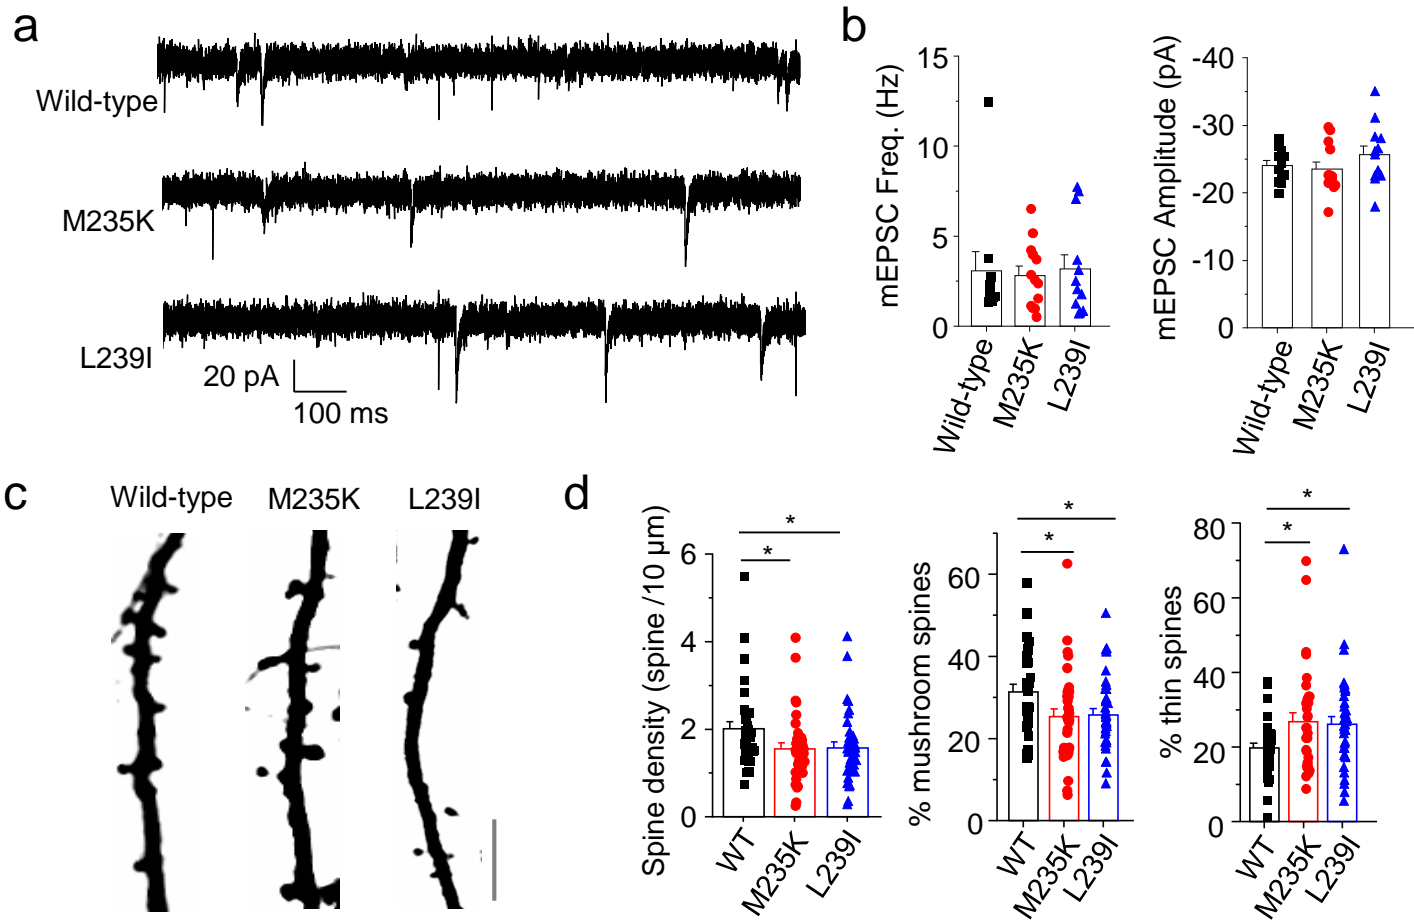

Figure 5

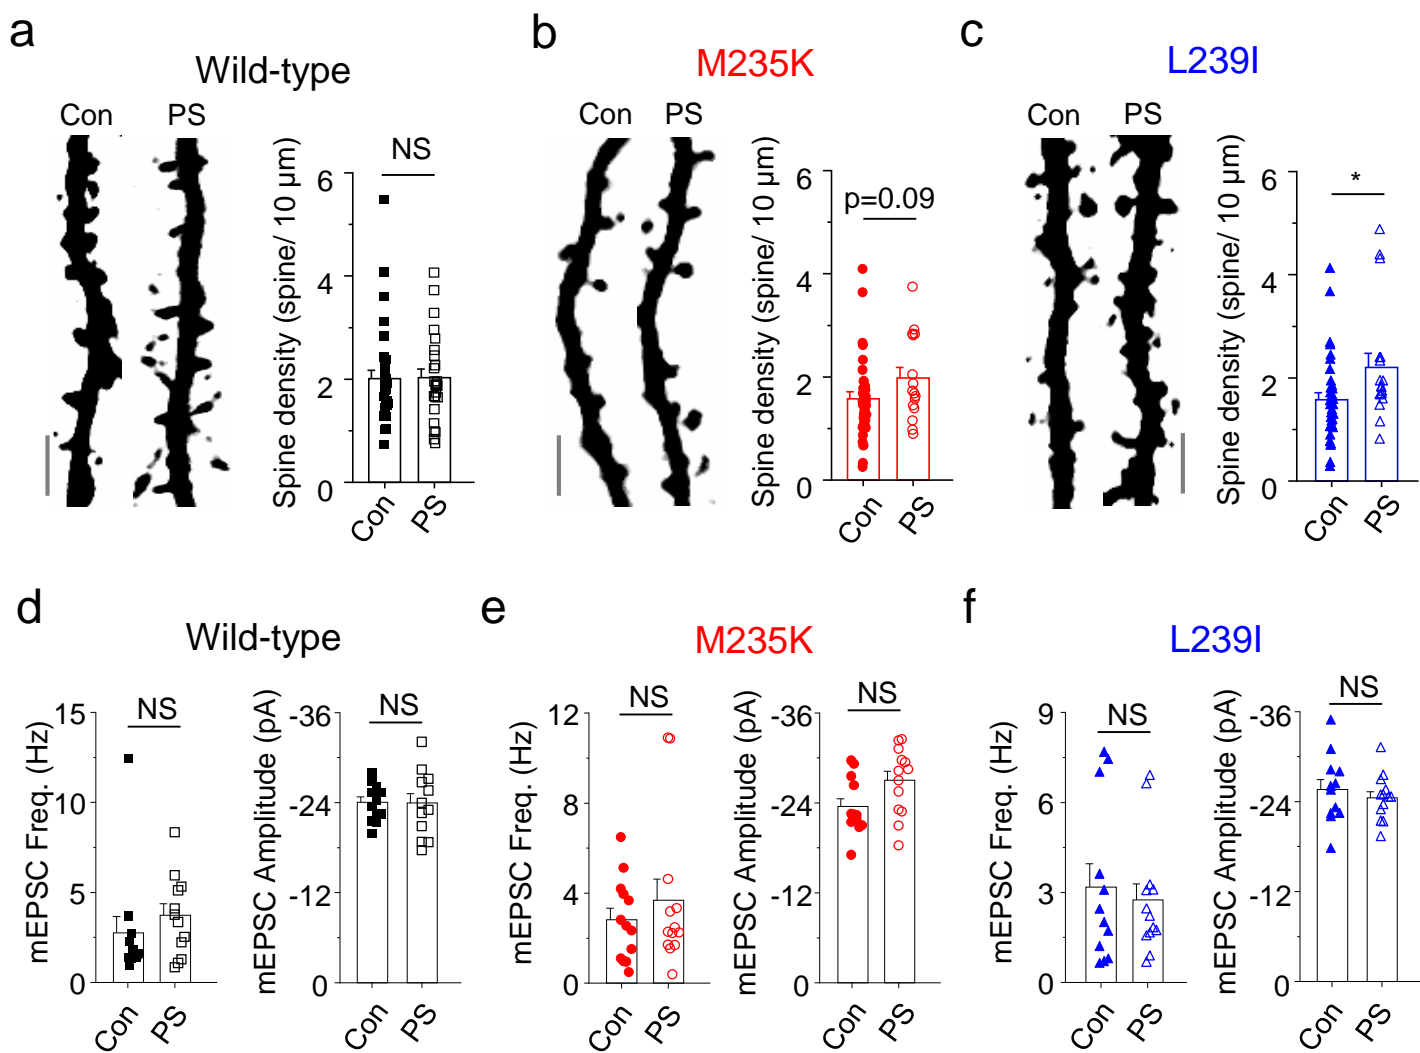

Figure 6

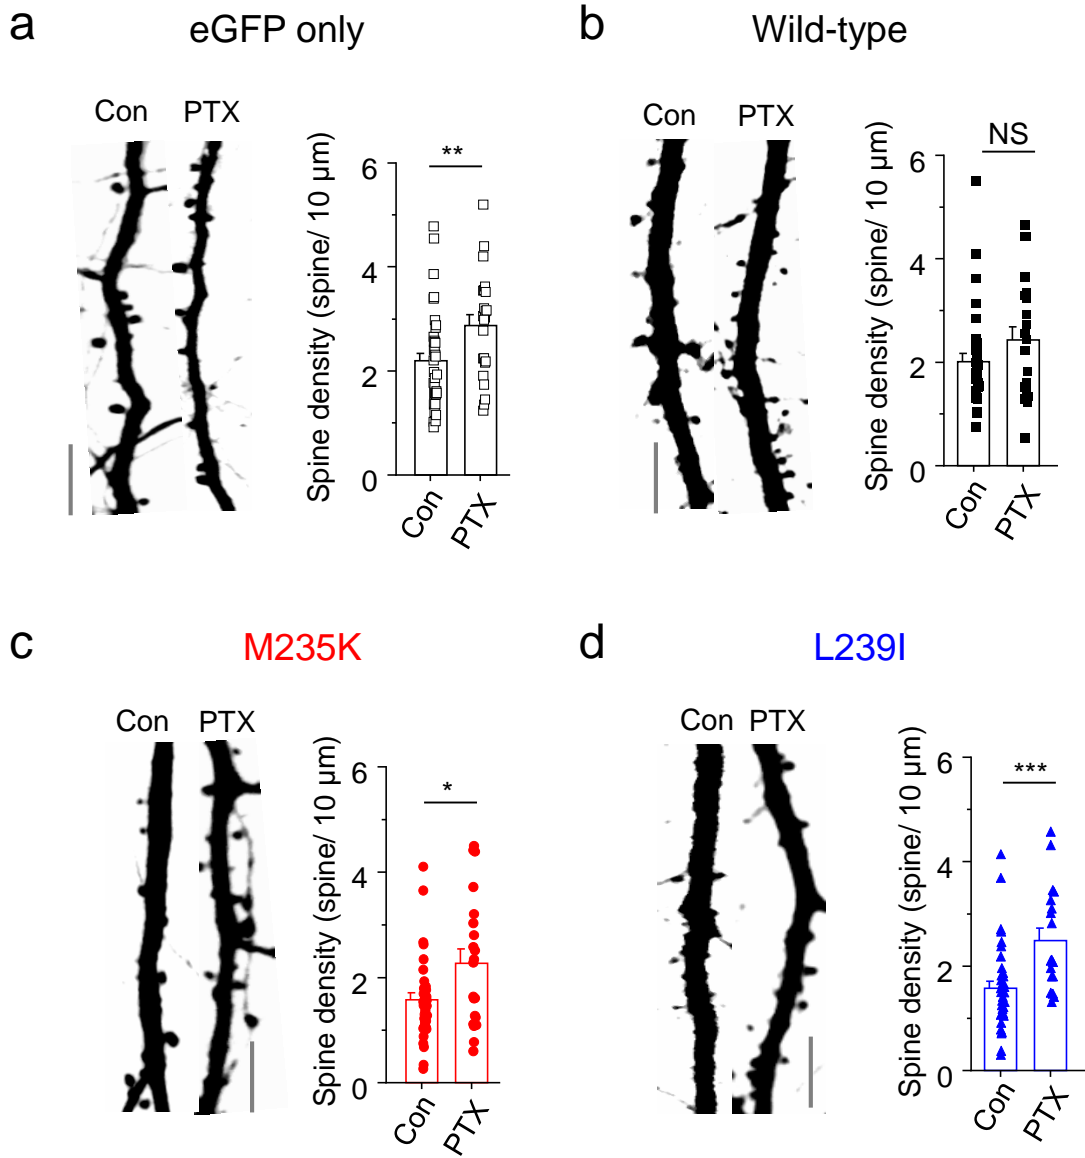

Figure 7

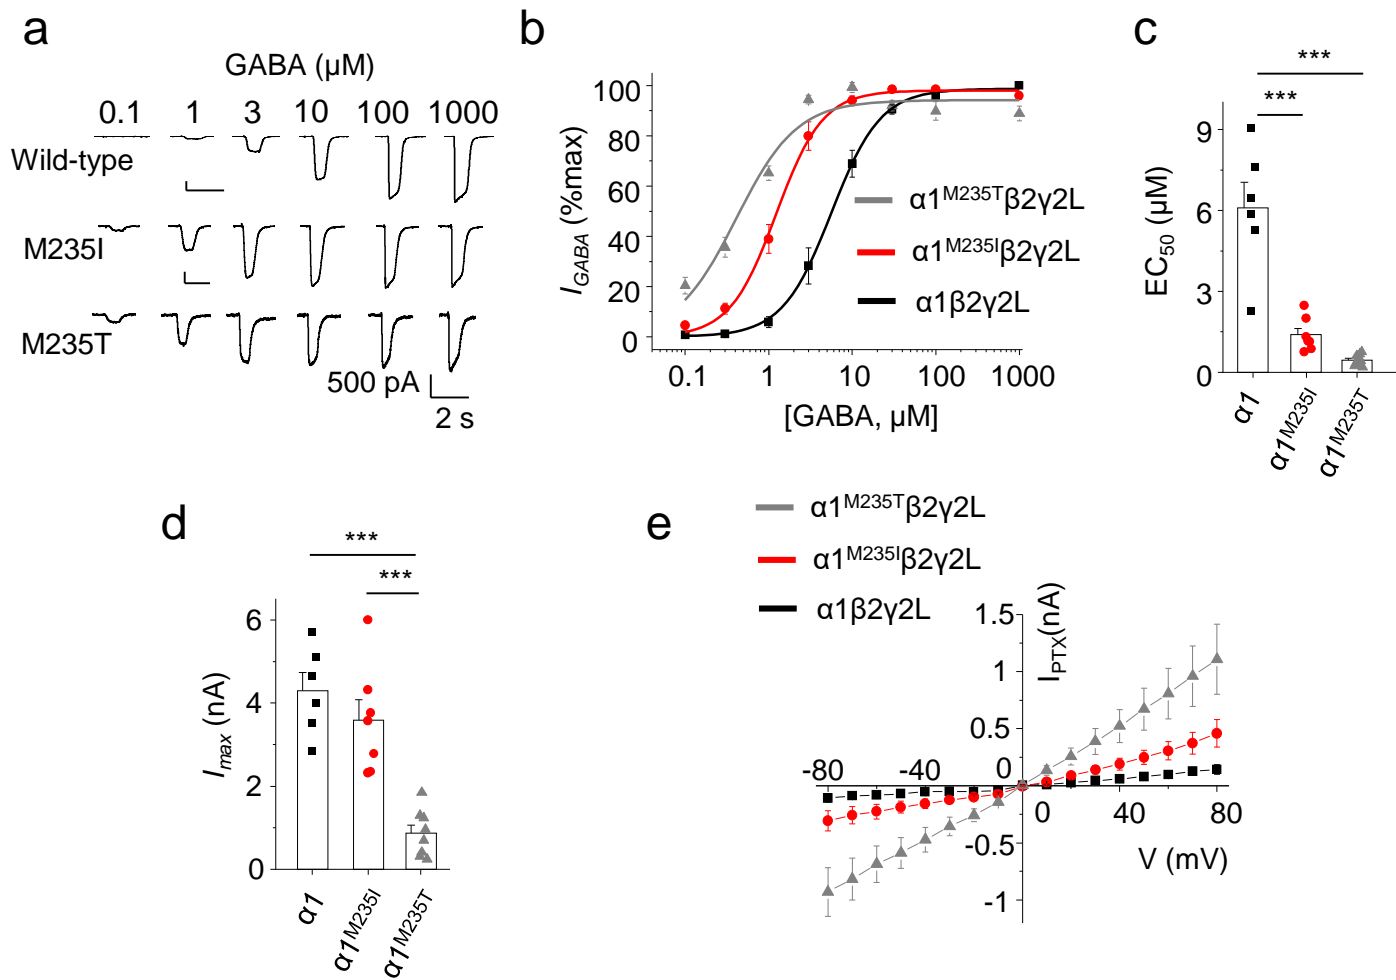

Figure 8
